# Supplementary material
Source: publisher figshare collection journal article supplement (https://acs.figshare.com/ndownloader/files/4505320)
Supplement: Supplementary file 1 [file 4505320]

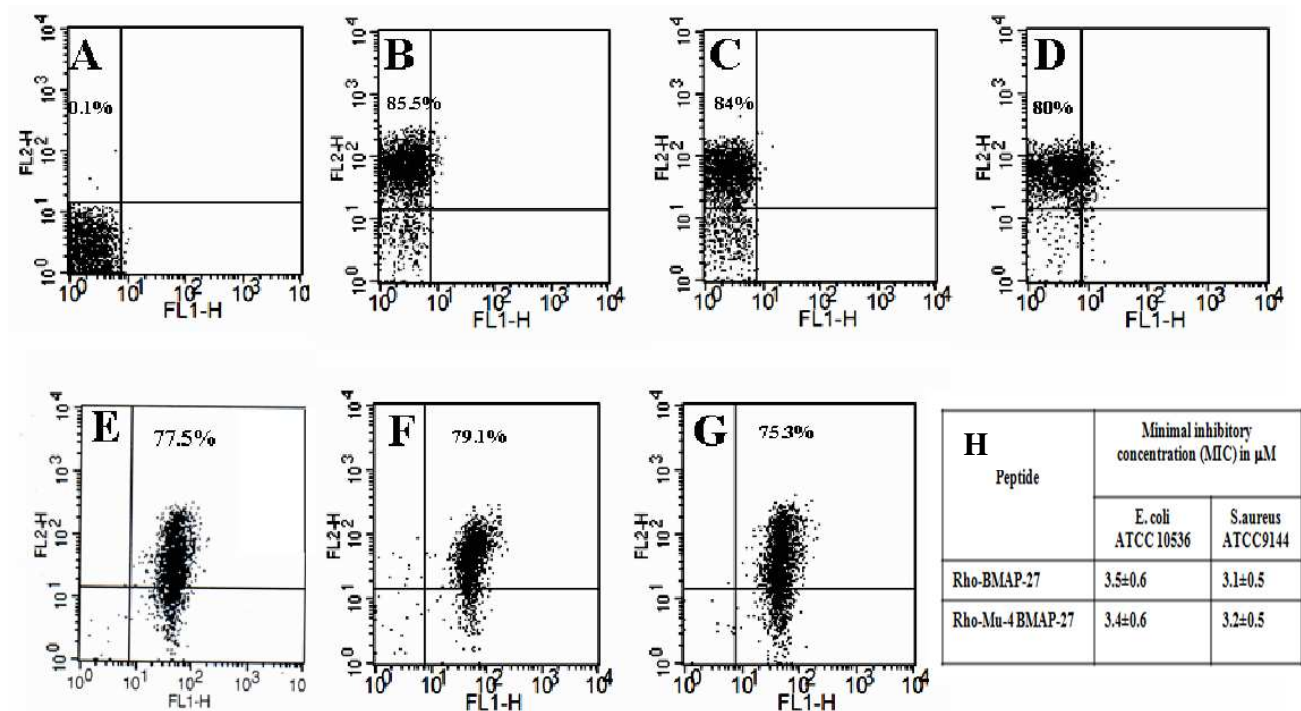

**Supplementary Figure-1**

PI staining of *E. coli* ATCC 10536 after their incubation with BMAP-27, Mu-1 BMAP-27 and Mu-4 BMAP-27 (Panel B-D) and the corresponding NBD-labelled versions (Panel E-F). Panel A shows the control experiment of staining of bacteria without any peptide treatment. Concentration of the peptides was  $4.2 \mu\text{M}$ . 10000 events were counted in each experiment. Panel H shows the antibacterial activity of Rho-labeled peptides. MIC values are the mean of three independent experiments each performed in duplicate  $\pm$ SD.
